# Supplementary material
Source: Springer Nature journal article supplement (https://www.springermedizin.de/resource/supplementary/12891_2009_756_MOESM2_ESM.pdf/9506542)

PTSC

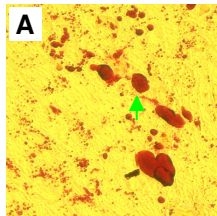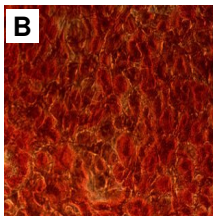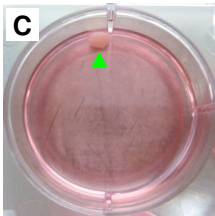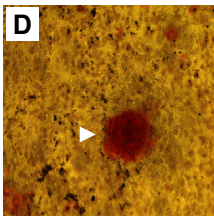

ATSC

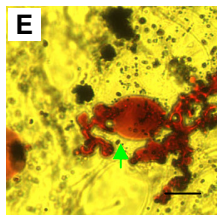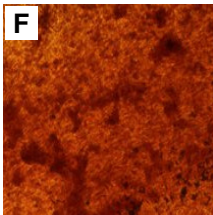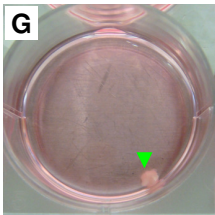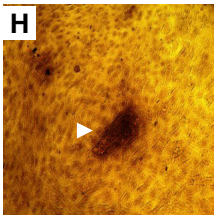

PT

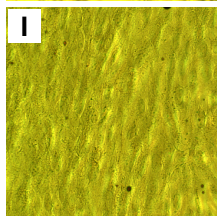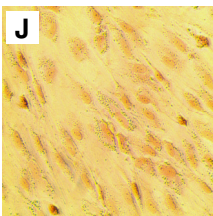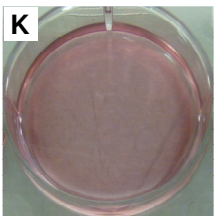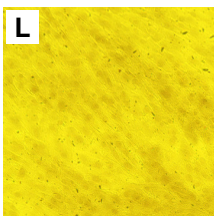

AT

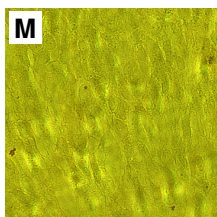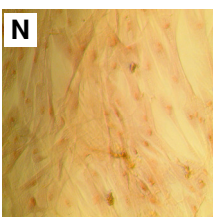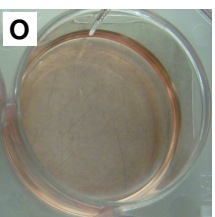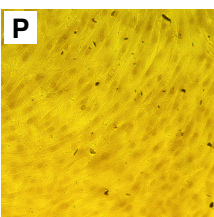

Supplement: MOESM2 [file 9506542]
